# Supplementary material for: Executive Functions of Adults with Binge-Eating Disorder: The Role of Weight Status and Psychopathology
Source: MDPI journal article supplement (doi:10.3390/brainsci12010006), 2021-12-22
Supplement: s1 [file s1]

## **Supplementary Materials for**

Nele Busch, Ricarda Schmidt, Anja Hilbert

### **Executive Functions of Adults with Binge-Eating Disorder: The Role of Weight Status and Psychopathology**

**Supplementary Table:** Linear Regression Analyses Using Clinical Parameters as Predictors and General and Food-Specific Executive Function Measures as Criteria.

**Supplementary Figures:** Number of Participants Included in Multivariate Analyses of Variance in Measures of General and Food-Specific Executive Functions.

**Table S1.** Linear Regression Analyses Using Clinical Parameters as Predictors and General and Food-Specific Executive Function Measures as Criteria.

| Measures                                  | BMI      |         |          |                       | PHQ-9 sum score |         |          |                       | EDE-Q global score |         |          |                       |
|-------------------------------------------|----------|---------|----------|-----------------------|-----------------|---------|----------|-----------------------|--------------------|---------|----------|-----------------------|
|                                           | <i>n</i> | $\beta$ | <i>p</i> | <i>R</i> <sup>2</sup> | <i>n</i>        | $\beta$ | <i>p</i> | <i>R</i> <sup>2</sup> | <i>n</i>           | $\beta$ | <i>p</i> | <i>R</i> <sup>2</sup> |
| Cards and Lottery Task                    |          |         |          |                       |                 |         |          |                       |                    |         |          |                       |
| NAD <i>T</i> score                        | 72       | 0.074   | .539     | .005                  | 69              | −0.088  | .472     | .008                  | 69                 | −0.028  | .817     | .001                  |
| Stop-Signal Task                          |          |         |          |                       |                 |         |          |                       |                    |         |          |                       |
| SSRT <i>T</i> score                       | 70       | 0.062   | .612     | .004                  | 67              | −0.274  | .025     | .075                  | 67                 | −0.190  | .124     | .036                  |
| Go/No-Go Task                             |          |         |          |                       |                 |         |          |                       |                    |         |          |                       |
| Commission errors <i>T</i> score          | 76       | −0.039  | .736     | .002                  | 73              | −0.138  | .244     | .019                  | 73                 | 0.028   | .817     | .001                  |
| N-Back Verbal                             |          |         |          |                       |                 |         |          |                       |                    |         |          |                       |
| Correct responses <i>T</i> score          | 76       | 0.058   | .621     | .003                  | 73              | −0.128  | .279     | .017                  | 73                 | −0.032  | .790     | .001                  |
| Trail Making Test                         |          |         |          |                       |                 |         |          |                       |                    |         |          |                       |
| Completion time <i>T</i> score            | 75       | −0.077  | .511     | .006                  | 72              | −0.129  | .281     | .017                  | 72                 | −0.154  | .198     | .024                  |
| Tower of London                           |          |         |          |                       |                 |         |          |                       |                    |         |          |                       |
| Planning score <i>T</i> score             | 70       | −0.127  | .294     | .016                  | 67              | −0.155  | .210     | .024                  | 67                 | −0.066  | .593     | .004                  |
| WAFA intrinsic visual                     |          |         |          |                       |                 |         |          |                       |                    |         |          |                       |
| Mean RT <i>T</i> score                    | 75       | 0.138   | .239     | .019                  | 72              | −0.226  | .056     | .051                  | 72                 | −0.067  | .575     | .005                  |
| Food-specific DPT                         |          |         |          |                       |                 |         |          |                       |                    |         |          |                       |
| Food attentional bias <i>T</i> score      | 73       | 0.078   | .510     | .006                  | 70              | −0.057  | .641     | .003                  | 70                 | −0.071  | .559     | .005                  |
| Food-specific AAT                         |          |         |          |                       |                 |         |          |                       |                    |         |          |                       |
| Approach bias high-caloric <i>T</i> score | 62       | 0.107   | .406     | .012                  | 61              | 0.058   | .660     | .003                  | 61                 | 0.131   | .314     | .017                  |

Note. AAT = Approach Avoidance Task; BMI = body mass index; DPT = Dot Probe Task; EDE-Q = Eating Disorder Examination-Questionnaire; NAD = number of advantageous decisions; PHQ-9 = Patient Health Questionnaire depression module; RT = reaction time; SSRT = stop-signal reaction time; WAFA = “Perception and Attention Functions Battery Alertness”.

$\beta$  represents the standardized regression weight.

Due to multiple testing, significance level was adjusted to  $\alpha = .0056$  using Bonferroni correction.

**Figure S1.** Number of Participants Included in Multivariate Analyses of Variance in Measures of General Executive Functions.

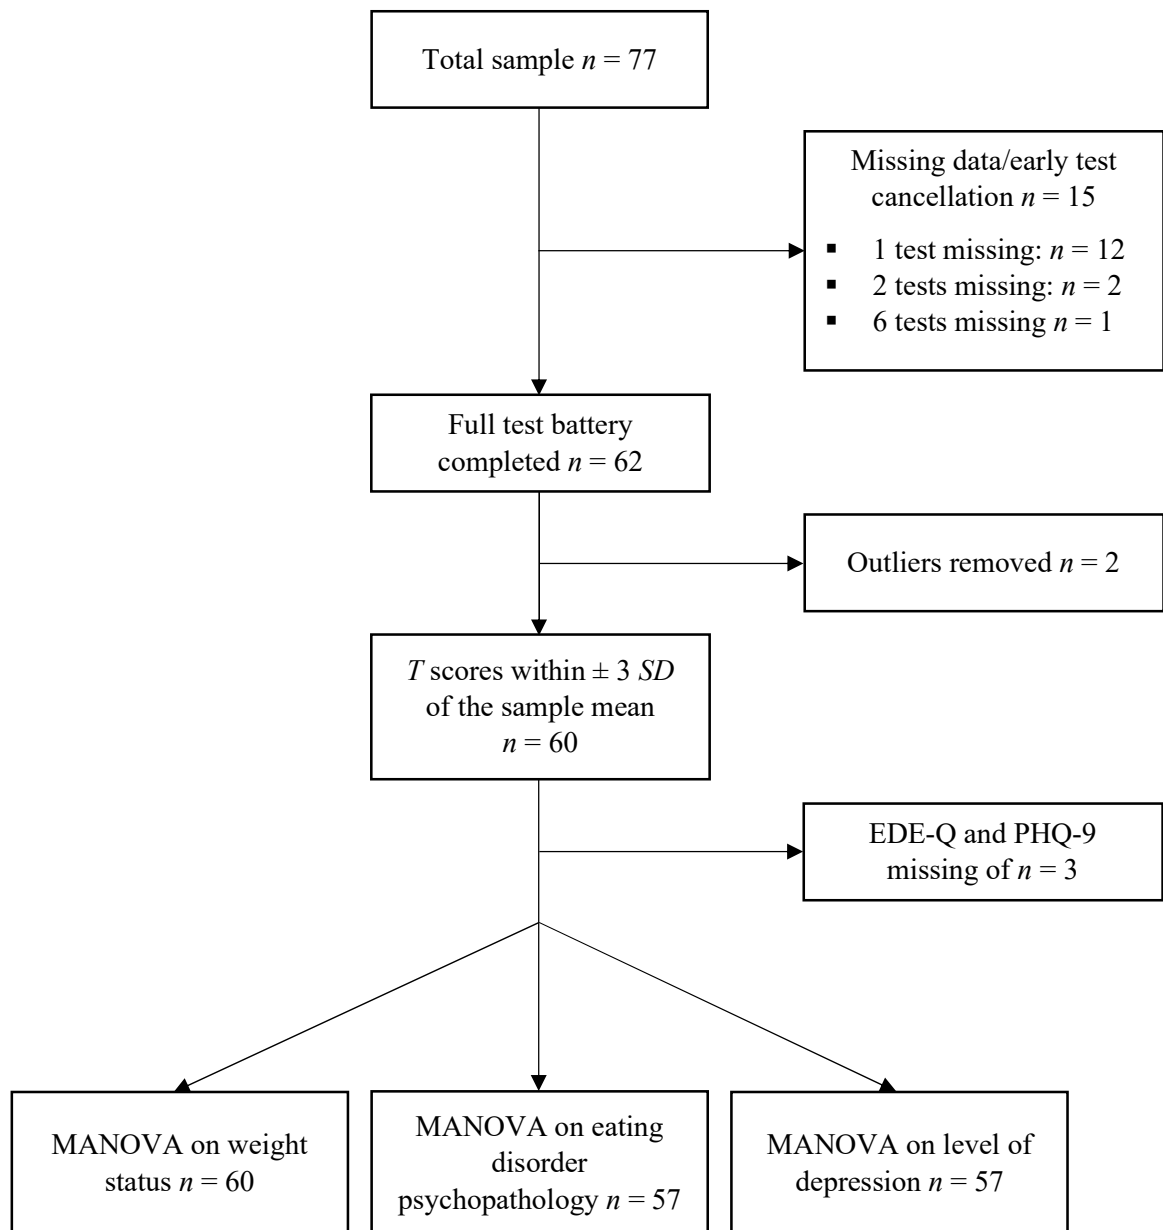

Note. EDE-Q = Eating Disorder Examination-Questionnaire; MANOVA = multivariate analysis of variance; PHQ-9 = Patient Health Questionnaire depression module.

**Figure S2.** Number of Participants Included in Multivariate Analyses of Variance in Measures of Food-Specific Executive Functions.

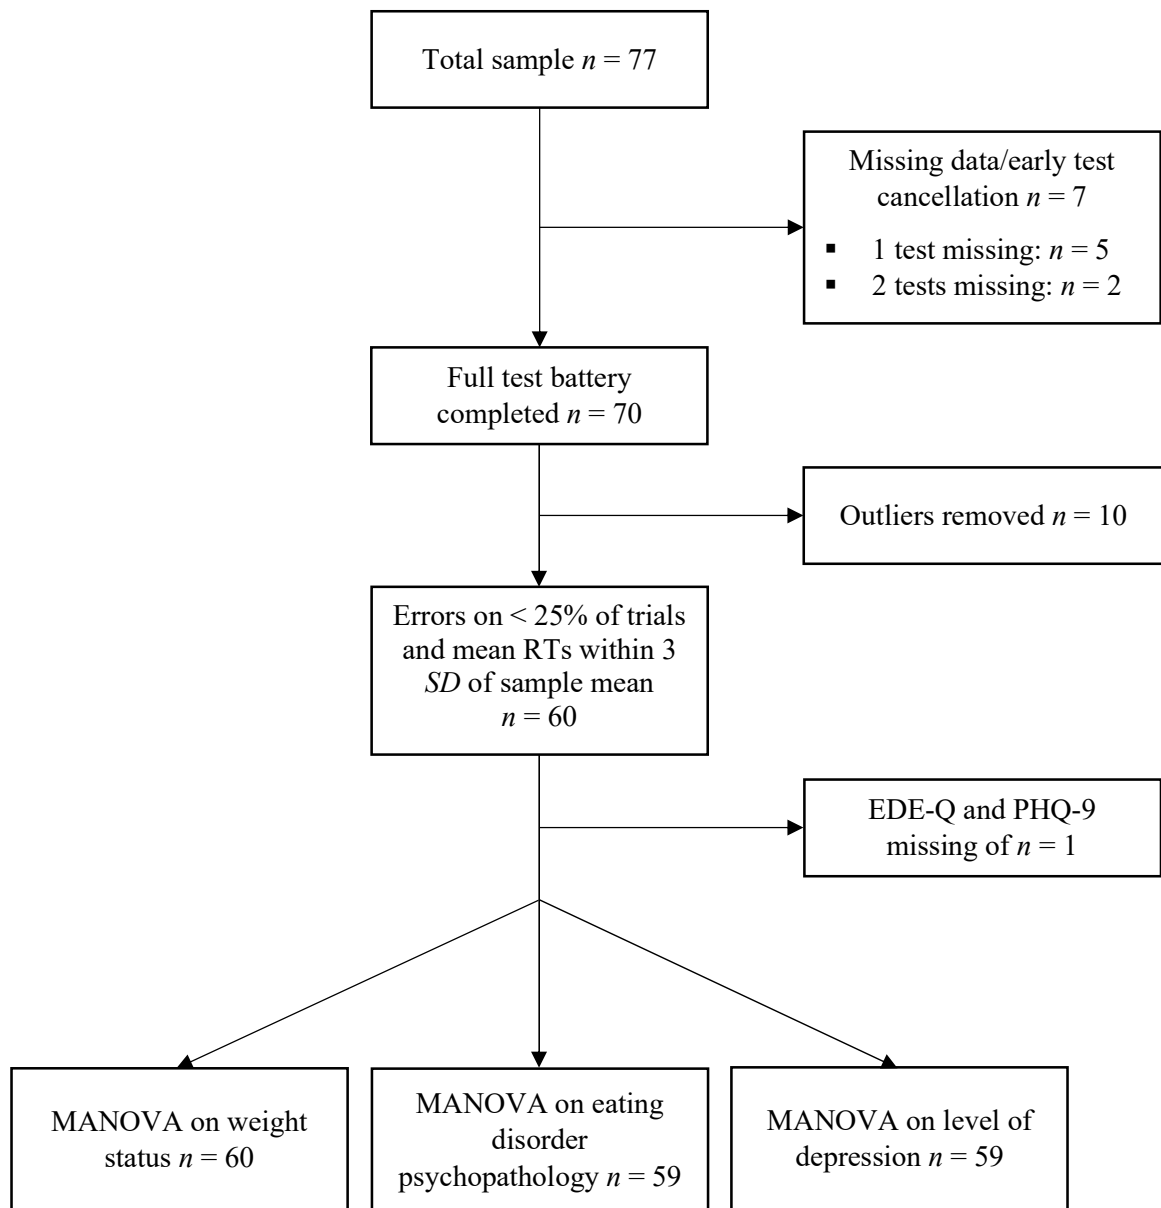

Note. EDE-Q = Eating Disorder Examination-Questionnaire; MANOVA = multivariate analysis of variance; PHQ-9 = Patient Health Questionnaire depression module.
